# Supplementary material for: Biofortification of rice with the essential amino acid lysine: molecular characterization, nutritional evaluation, and field performance
Source: PubMed Central journal article supplement (PMC5301931; doi:10.1093/jxb/erw209), 2016-06-01
Supplement: supp_erw209_supplementary_figures_S1_S7_Tables_S1_S2.pdf [file supp_erw209_supplementary_figures_S1_S7_Tables_S1_S2.pdf]

**A** GR-14  
AATAAATAAACTATGAGCTCCCTCCAAAATAATTAGCTAGCAGCATCTAATCTACTGGTAGTATTGGAA  
*Rice genome DNA*  
GTCTGTCCATGATAGTACTGATGAAAATGGCAGTGTGCTATAGTGTGCACATTCATCGATTGGAA  
  
GTATGCAAAGCTAGGTCACTCTCTAGATTAGATTACATTTGCTAATCTAGTGCCAATCTAGTGGAGTT  
*Rice chromosome 5 position 23,215,640* ↓  
GCCTAGCTATCTGGACTTTCAAGTGATGTTAAAGGACGTACACTAGTGTGTGGCAGGATATATG  
*Miss sequences* *Left border region*  
TGTTGTAACAAAATTGACGCTTAGACAACCTTAATAACACATTCGGGACGTTTTTAATGTACTGAATTA  
CGCCGAATTA .....

**B**  
AATAGCGAAGAGGCCCGCACCGATCGCCCTCCCAACAGTTGCGCAGCCTGAATGGCGAATGCTAGG  
*Right border region*  
CAGCTTGAGCTGGATCAGATTGCTGTTCCCGCCTCAGTTAAACTATCAGTGTGGACAGGATATAT  
*Miss sequences* ↓ *Rice chromosome 5 position 23,215,639*  
TGCGCGGTAAACCTAAGAGAAAAGAGCGTTTATTAGTTCTAAAATTGAGGAGAAGTTAGAAAAAT  
TAAAGTTGGTAGTTGAAAAAAAAGTTAAGAGTTTATGTGTAGAAAAGTTTGGATGTGATGGAA  
*Rice genome DNA*  
AGTTGGAAGTTTAGGG

**C** GR-65  
ACAAAACCTGGGTATATCGACACCTCCATCTATTAACCCGGTGCAAAACAATGCCCTCTGGGTGGTTTTTG  
*Rice genome DNA*  
GATGACATGACGCCTATATGGCGATTTAACCGAGTCTTTGTCTACGTGGCGTTTATGTGGTATTAGAA  
  
TAAAATAAAAAGAATAAATGGACCTATATGTCATTACATAAATAATGATTGTAGAACCCTGACAT  
*Rice chromosome 8 position 23,272,802* ↓ *Miss sequences*  
ACCGGGTTTTGTGGTTGAAGGACGTGAATCATACTCGAGAGATAGTTGAGGGAGTCAAAGTATACTTT  
*Miss sequences*  
TTCCATAACTCTCCATAATTTGCATGGGCTGATCAATGTGTCGCCGCTGGTGGCAGGATATATTGGTT  
*Left border region*  
GTAAACAAATTGACGCTTAGACAACCTTAATAACACATTCGGGACGTTTTTAATGTACTGAATTAACGCC  
GAATTA .....

**D**  
GCCCCACCGATCGCCCTCCCAACAGTTGCGCAGCCTGAATGGCGAATGCTAGAGCAGCTTGAGCTT  
*Right border region* *Miss sequences*  
GGATCAGATTGCTGTTCCCGCCTCAGTTAAACTATCAGTGTGGACAGGATATATGGCGGGTAAA  
*Filler DNA*  
CCTAAGAGAAAAGAGCGTTTAAACGTCGCTGACGCGCTCTAATTTGGGCTAGAGCTGGTATACTCCGT  
↑ *Rice chromosome 8 position 23,272,727*  
GGTCCITGGCATTTGCCGATTTGACCGAGTTAGCCACGAATGAAAGTTATGCAITGCAGCGAGAGTTT  
AAATTCAGATCACTATTTTTTAGATAATATCAGATCACTATTGGATTAGGGAATGTTAATTGAAAAG  
TTATAGCTAATCTGGTACAGCCAGTAGCTCGAAAAGACCCCTGCAAAGGTAAGAACTAAGAAAAGAC  
*Rice genome DNA*  
CGAAGAACACTGAAGAGAAAAGGAGCTAGGCATATGC

**E** 35S-15  
GGAGCCCGTATGGTTGAACCATTGGATTCTCTCTGAAAGTACTATGGCAGTTGGGGCATGTCGTCTATC  
*Rice genome DNA*  
CAGTGTACGTTTTGACAAACACGACGTTGGAACACACGAGAATTACACGGTACTGGCATTGACAG  
*Rice chromosome 6 position 27,381,325* ↓ *Miss sequences*  
CTGCAGCCGGCGTTGACATGAATAGCCTCTAAAGTCGCCGTTGGCAGGATATATTGGGTGTAACAA  
*Right border region*  
ATTGACGCTTAGACAACCTTAATAACACATTCGGGAC .....

**F**  
AGAGGCCCGCACCGATCGCCCTCCCAACAGTTGCGCAGCCTGAATGGCGAATGCTAGAGCAGCTTG  
*Left border region*  
AGCTTGGATCAGATTGCTGTTCCCGCCTCAGTTAAACTATCAGTGTGGACAGGATATATGGCGG  
*Miss sequences* *Miss sequences*  
GTAAACCTAAGAGAAAAGAGCGTTTAACTAATACGTTACTGTACCAGCAAGCAGCAAGTTGC  
↓ *Rice chromosome 6 position 27,381,264*  
CAACCGACCACAAACCGATGAGCAGGAACAAAACAGTGGGACTAGTCCACTCTCTAGCTGGCTAGCA  
CTGTGATATATACTCCGTATTTGTGTGAAATTGTGACTTGCATCGTCCATGGCAGGCTAAACATGGTC  
CTCCACACACTCCAGTACGCTAGTTCCGGTGTACACAGGTCACGCGTTTACAATGTCATCCACCCG  
*Rice genome DNA*  
GACAGTCCACGACGAGCTCTACCCGTACAGTTCCATACACCAA

**Supplementary Figure S1.** Junction and flanking sequences of the target T-DNA in three transgenic lines. (A-B) GR-14, (C-D) GR-65, (E-F) 35S-15. A, C and E are left border regions and the flanking rice genome sequences. B, D and F are right border regions and the flanking rice genome sequences. Left and right border regions are presented in blue letters, and the miss sequences of them are presented in underline blue. Filler DNAs are depicted in underline red letters. Rice genome sequences are presented in green letters, and the miss sequence of them are presented in underline green. Arrows indicate the junction position based on rice genome (<http://www.gramene.org/>).

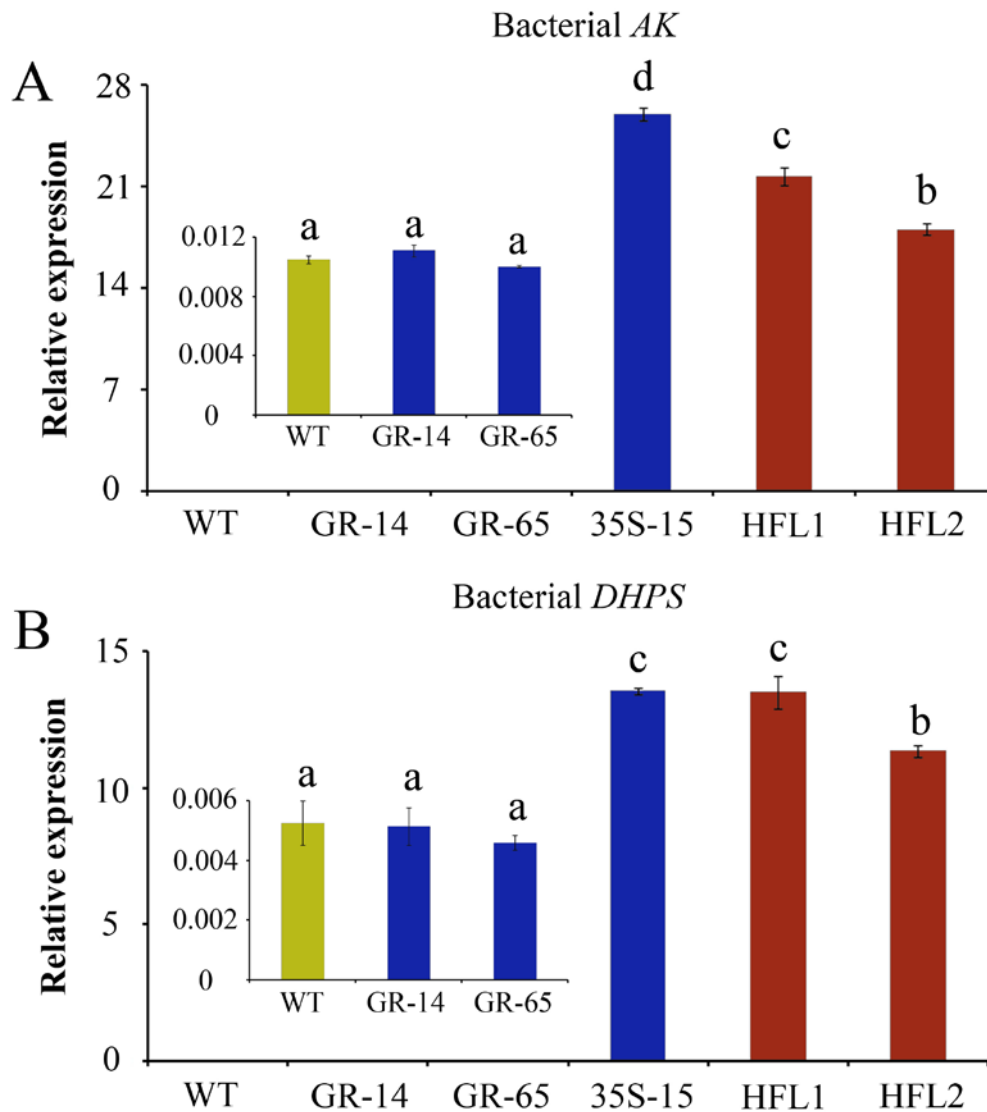

**Supplementary Figure S2.** Quantitative RT-PCR analysis of bacterial *AK* (A) and *DHPS* (B) transcript levels in leaves of wild-type and transgenic rice. *Actin* was used as the control. The error bars refer to SDs (standard deviation) of three biological replicates. The different letters indicate statistical significance among transgenic plants and wild type at  $P < 0.05$ .

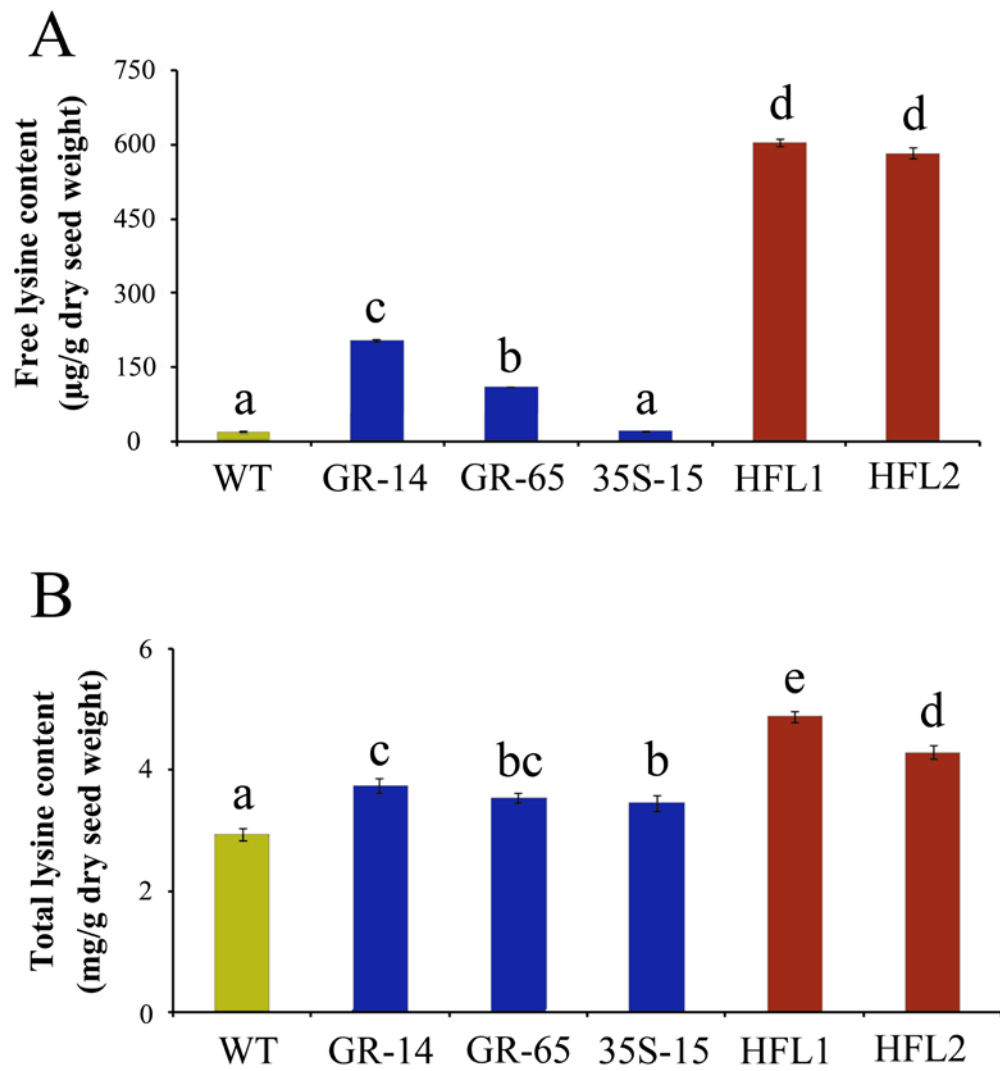

**Supplementary Figure S3.** The contents of free (A) and total lysine (B) in mature grains of transgenic and wild-type rice (Yangzhou, 2009). The error bars represent SDs of three biological replicates. The different letters indicate statistical significance among transgenic plants and wild type at  $P < 0.05$ .

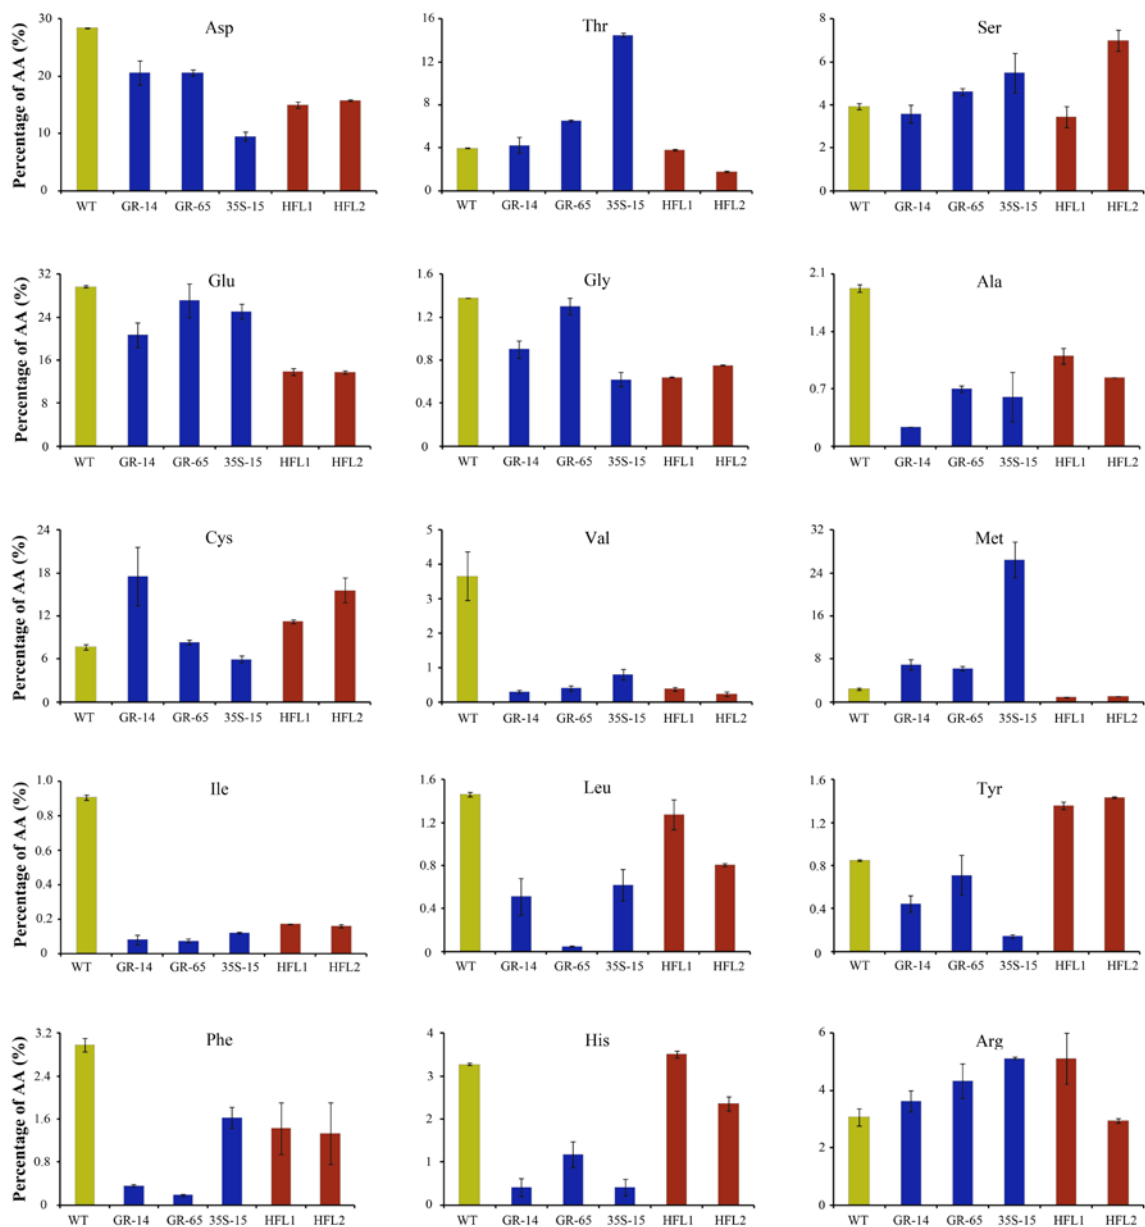

**Supplementary Figure S4.** Comparison of the percentage (by weight) of other individual free amino acids to total measurable free amino acids.

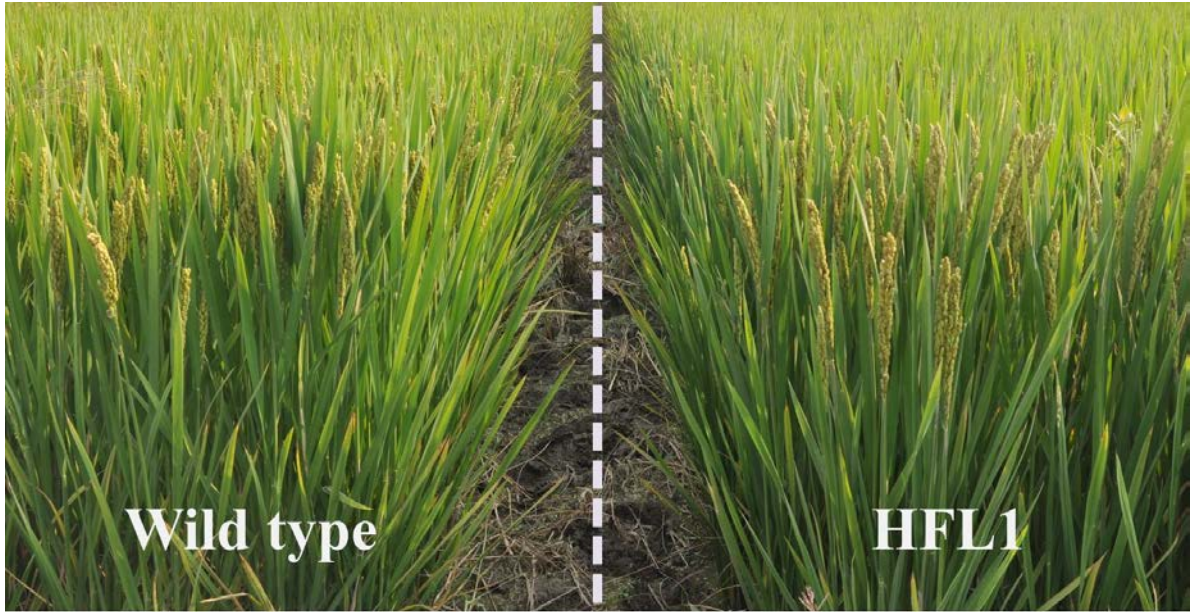

**Supplementary Figure S5.** Growth performance of wild type and HFL1 rice in the field.

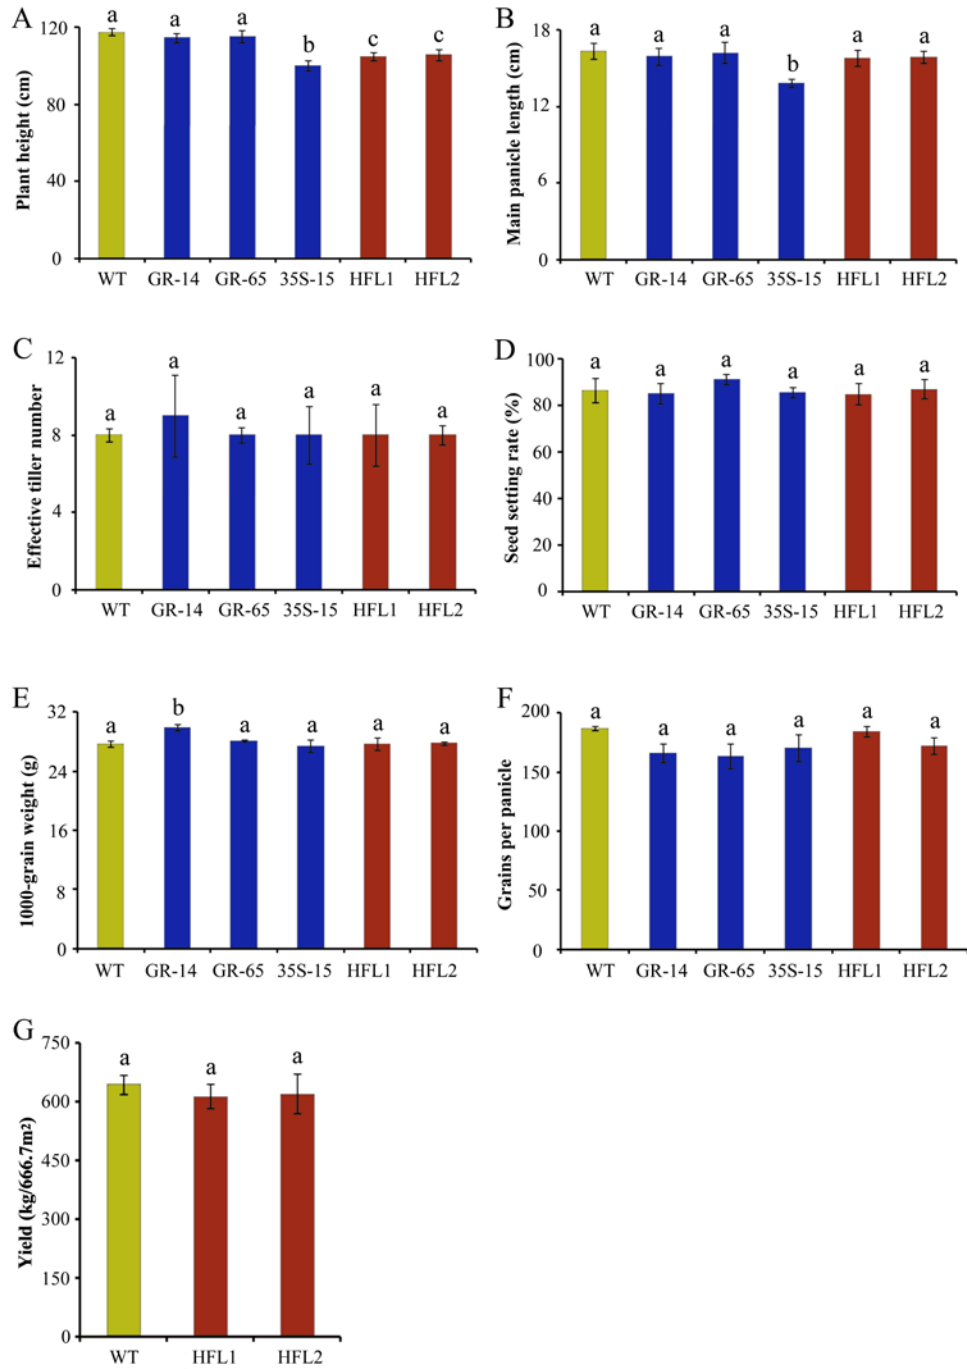

**Supplementary Figure S6** The major agronomic traits of transgenic and wild-type plants (Yangzhou, 2013). Error bars are based on three independent biological replicates. The different letters indicate statistical significance among transgenic plants and wild type at  $P < 0.05$ .

**Supplementary Table S1.** Primers used in this study.

| <b>Primer</b> | <b>Nucleotide sequence (5'-3')</b> |
|---------------|------------------------------------|
| P35s-F        | TCCTTCGCAAGACCCTTCCTC              |
| DHPS-2        | TTACAGCAAACCGGCATG                 |
| LKR-R         | CCTTAGCTGAGGCCAATCTAG              |
| NOS-2         | GACCGGCAACAGGATTCAAT               |
| 28-F3         | GGAGCCCGTATGGTTGAACCATTTGGA        |
| 28-R3         | TTGGTGTATGGAAGTGTACGGGT            |
| 09-F          | TTGCAGGGGTCTCTTTCG                 |
| 09-R          | TGCTCTGGGTGGTTTTTG                 |
| 10-F          | TGTTTACTCCTTGCTTGATTGTT            |
| 10-R          | TGGTAGTTTATGGAAGTCGTCTC            |
| LB3           | GTCCGCAATGTGTTATTAAGTTGTC          |
| SP1           | TTCTCCATAATAATGTGTGAGTAGT          |
| SP2           | ACCCTTAGTATGTATTTGTATTTG           |
| SP3           | GTCCGCAATGTGTTATTAAGTTGTC          |
| SP4           | TCTAGTAACATAGATGACACCGC            |
| SP5           | TAAATGTATAATTGCGGGACTC             |
| SP6           | GGACTCTAATCATAAAAACCCATC           |
| Hyg-1         | GCTGTTATGCGGCCATTGTC               |
| Hyg-2         | GACGTCTGTGCGAGAAGTTTC              |
| Akrt-F        | CTGACACTTCGGACCACTGACTACC          |
| Akrt-R        | ACACCATCAACATCTTCCATACCTG          |
| DHSPrt-R      | CCCTGCTCAGTTGCGTGAATAG             |
| DHPSrt-F      | GTAGTGAAGTGAAAAATCGGACATC          |
| LKRrt-F       | ACTCTTCAATGCTTGTAACATCTCC          |
| LKRrt-R       | AGTAGGGTTGCTTGGTGCTTT              |
| EDHPS-RT1     | TTCTTGCGACGGACGATTGTAGTAA          |
| EDHPS-RT2     | GATGAAAAAGGTAATGTCTGTCTGGG         |
| AK1-RT1       | AGGAAGCACAGGTTATGGCTGGATG          |
| AK1-RT2       | AGTGAGCGTGGCATTAACCCTTGAT          |

**Supplementary Table S2.** Parameters of RVA profiles of flours and purified starches from mature rice grains.

|        | <b>Transgenic line</b> | <b>PKV*</b> | <b>HPV*</b> | <b>BDV*</b> | <b>CPV*</b> | <b>SBV*</b> | <b>PeT*</b> | <b>PaT*</b> |
|--------|------------------------|-------------|-------------|-------------|-------------|-------------|-------------|-------------|
| Flour  | WT                     | 2916        | 1752        | 1164        | 3009        | 1257        | 6.2         | 71.1        |
|        | GR-14                  | 2745        | 1645        | 1100        | 2951        | 1306        | 6.2         | 70.2        |
|        | GR-65                  | 2749        | 1794        | 955         | 3077        | 1283        | 6.4         | 69.5        |
|        | 35S-15                 | 2483        | 1346        | 1137        | 2802        | 1456        | 6           | 71.9        |
|        | HFL1                   | 2184        | 1140        | 1044        | 2538        | 1398        | 5.8         | 72.6        |
|        | HFL2                   | 2097        | 1187        | 910         | 2451        | 1264        | 6.1         | 75.1        |
| Starch | WT                     | 884         | 792         | 92          | 1115        | 323         | 6.7         | 91.7        |
|        | GR-14                  | 906         | 783         | 123         | 1120        | 337         | 6.9         | 92.4        |
|        | GR-65                  | 908         | 789         | 119         | 1149        | 360         | 6.9         | 91.5        |
|        | 35S-15                 | 882         | 796         | 86          | 1218        | 422         | 6.7         | 91.6        |
|        | HFL1                   | 804         | 728         | 76          | 1091        | 363         | 6.7         | 92.4        |
|        | HFL2                   | 889         | 775         | 114         | 1078        | 303         | 6.9         | 91.7        |

\* PKV, peak viscosity; HPV, hot paste viscosity; BDV, breakdown; CPV, cool paste viscosity; SBV, setback; PeT, peaking time; PaT, pasting temperature.
